# Supplementary material for: Digital nanoliter to milliliter flow rate sensor with in vivo demonstration for continuous sweat rate measurement
Source: Royal Society of Chemistry journal article supplement (doi:10.1039/c8lc00968f), 2018-12-07
Supplement: c8lc00968f2.pdf [file c8lc00968f2.pdf]

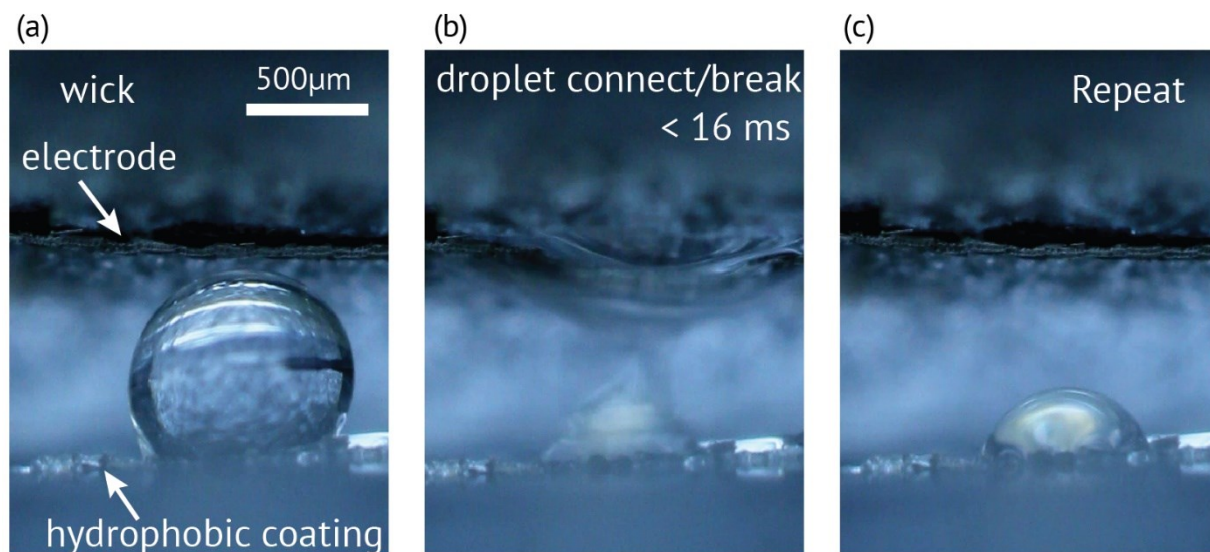

Figure 1S – (a) Droplet formation with a hydrophobic coating showing a more spherical droplet formation. (b) Droplet breaking onto the electrode/wick in less than 16 ms (maximum frame rate for video), and (c) the process repeating.

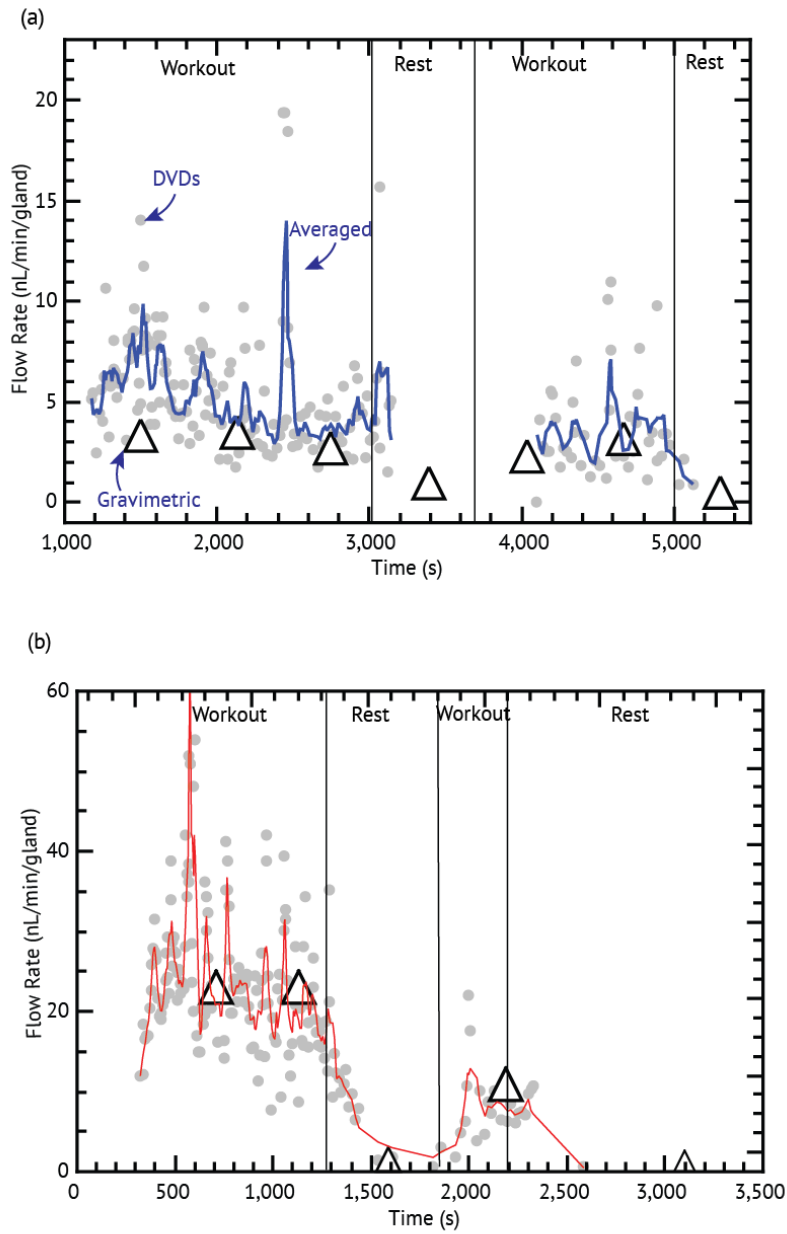

Figure 2S – (a) Exercise sweat test for a female subject and (b) male subject. Shows DVDs (gray circles) and gravimetric data (white triangles). The moving average of the DVDs data is also shown (blue line).

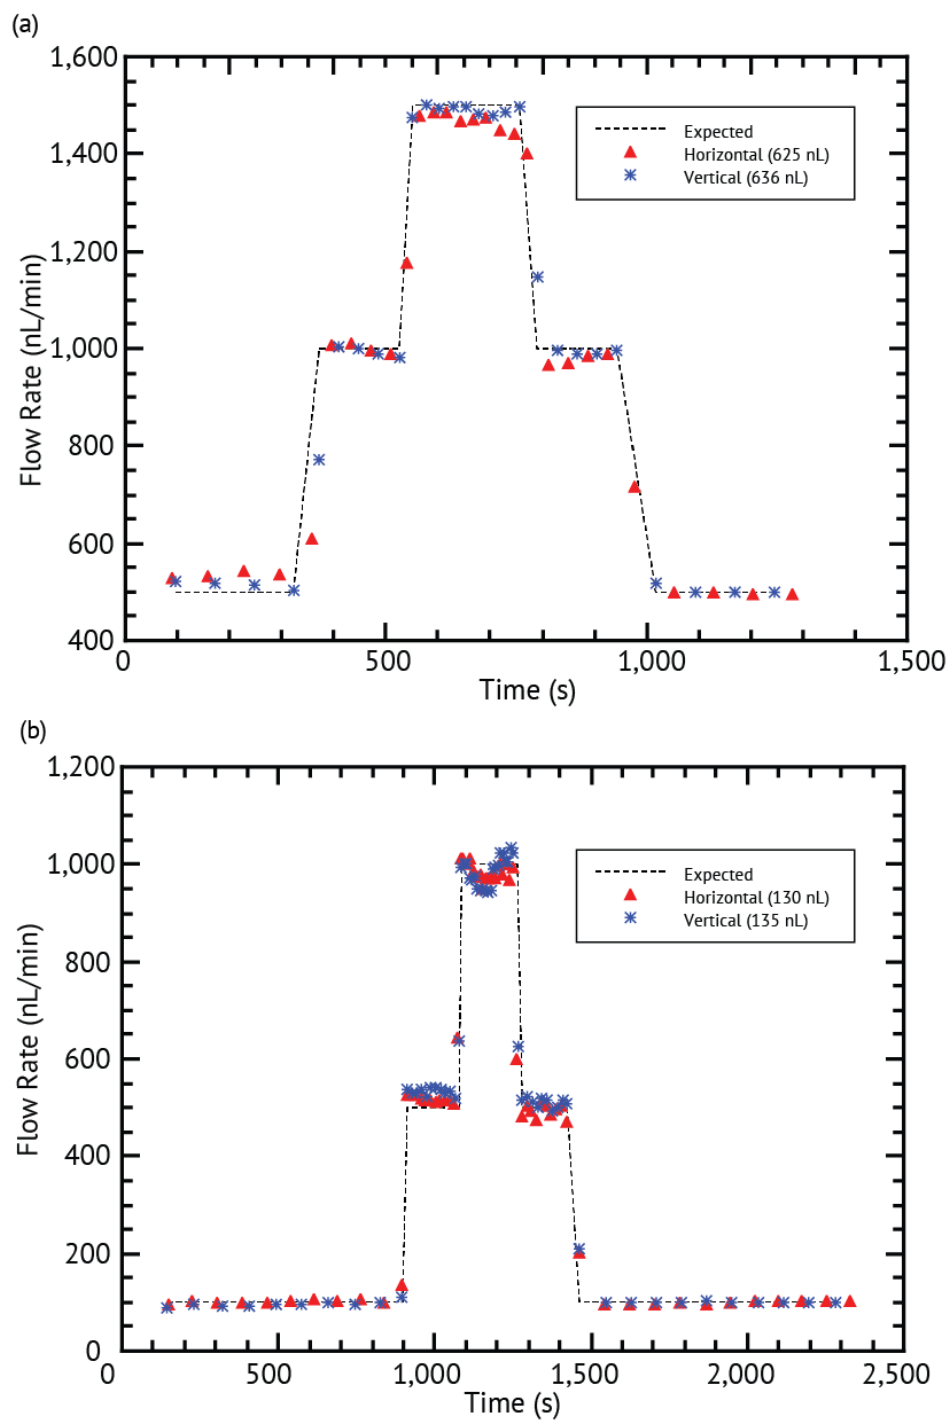

Figure 3S – Gravity experiments showing identical calibration runs for horizontal (triangles) and vertical (stars) positions for (a) large well layer (XXX  $\mu\text{m}$ ) and (b) small well layer (XXX  $\mu\text{m}$ ).

**Table 1S** – Longevity experiment. Continuous flow set at 100nL/min with daily calibration runs (100,500,1000,500,100 nL/min) until failure. Average volume and Std. Dev. calculated for each calibration run.

| <b>Day</b> | <b>Average<br/>Volume (nL)</b> | <b>Standard<br/>Deviation (nL)</b> |
|------------|--------------------------------|------------------------------------|
| 1          | 190                            | 8.90                               |
| 2          | 185                            | 4.12                               |
| 3          | 184                            | 3.31                               |
| 4          | 185                            | 4.73                               |
| 8          | 216                            | 3.90                               |
| 9          | 222                            | 4.27                               |
| 10         | 226                            | 4.31                               |
| All        | 197                            | 17.9                               |
